# Supplementary figures and images for: Low Temperatures Affect the Physiological Status and Phytochemical Content of Flat Leaf Kale (Brassica oleracea var. acephala) Sprouts
Source: MDPI journal article supplement (doi:10.3390/foods11030264), 2022-01-19

Figure S1. Representative chromatogram of glucosinolates analysis

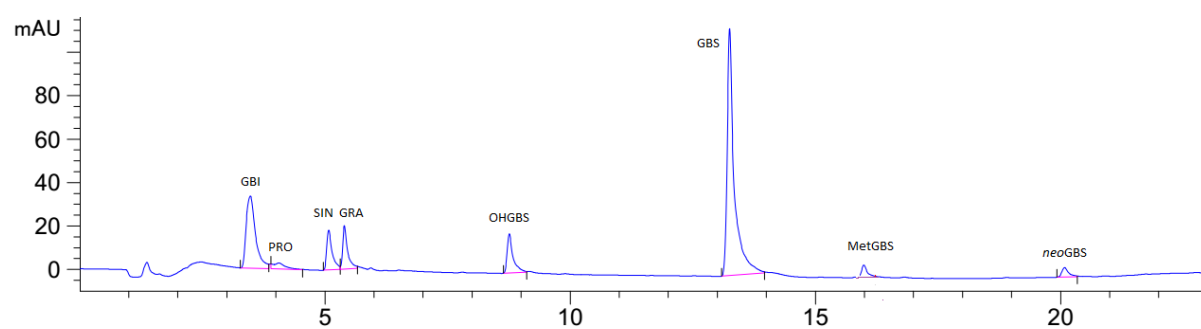

Supplement: s1 [file s1]
